# Supplementary material
Source: PubMed Central journal article supplement (PMC2593661)
Supplement: pp.108.129510_1.pdf [file pp.108.129510_1.pdf]

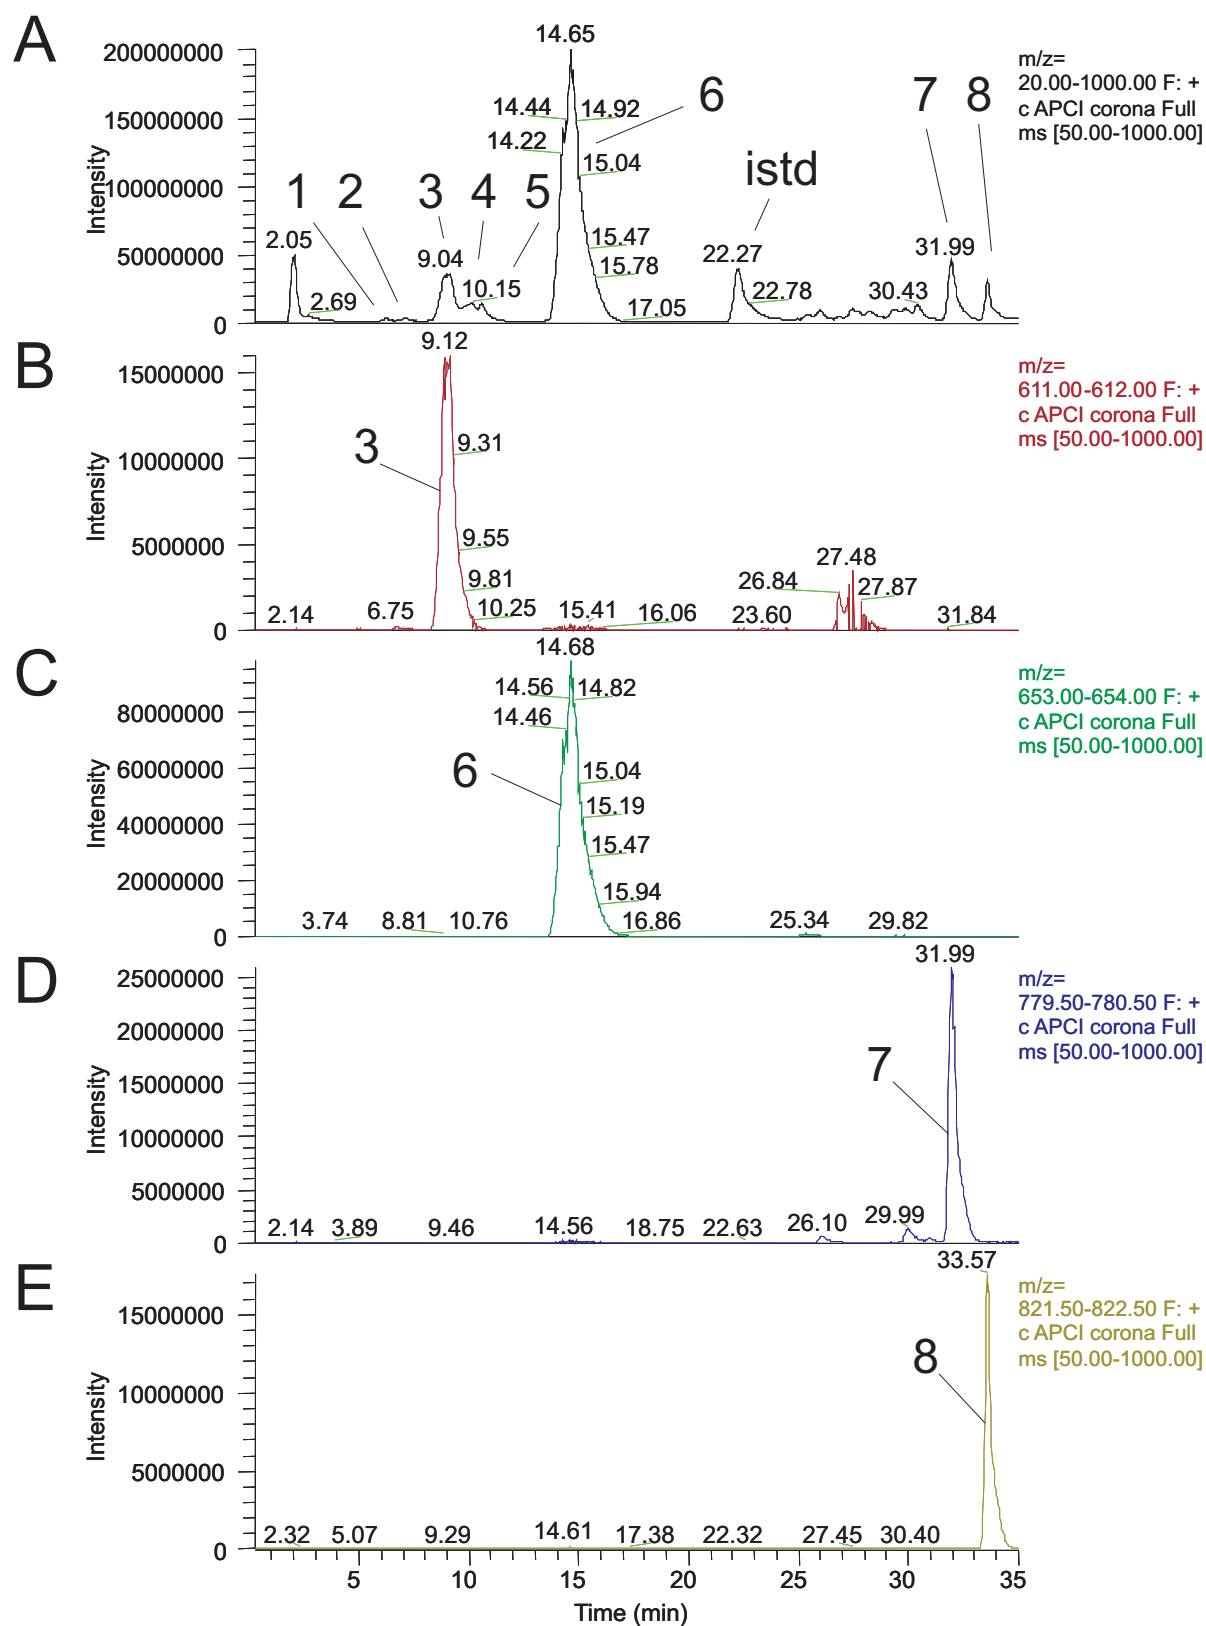

**Figure S1.** Leaf methanol washes consist predominantly of acyl sugars. A, LC-MS trace showing separation of *N. benthamiana* leaf exudate on a PGC (Porous Graphite Carbon) column (Hypercarb, Thermo Hypersil). Labelled acyl sugar peaks (1-8) are defined in Table S1. B-E, Contribution of the major MS spectrum ion  $[M+18]^+$  derived from the major acyl sugars to their peaks shown in (A). Mass ranges are shown identifying  $[M+18]^+$  with values in Table S1.
