# Supplementary material
Source: PubMed Central journal article supplement (PMC2593661)
Supplement: pp.108.129510_2.pdf [file pp.108.129510_2.pdf]

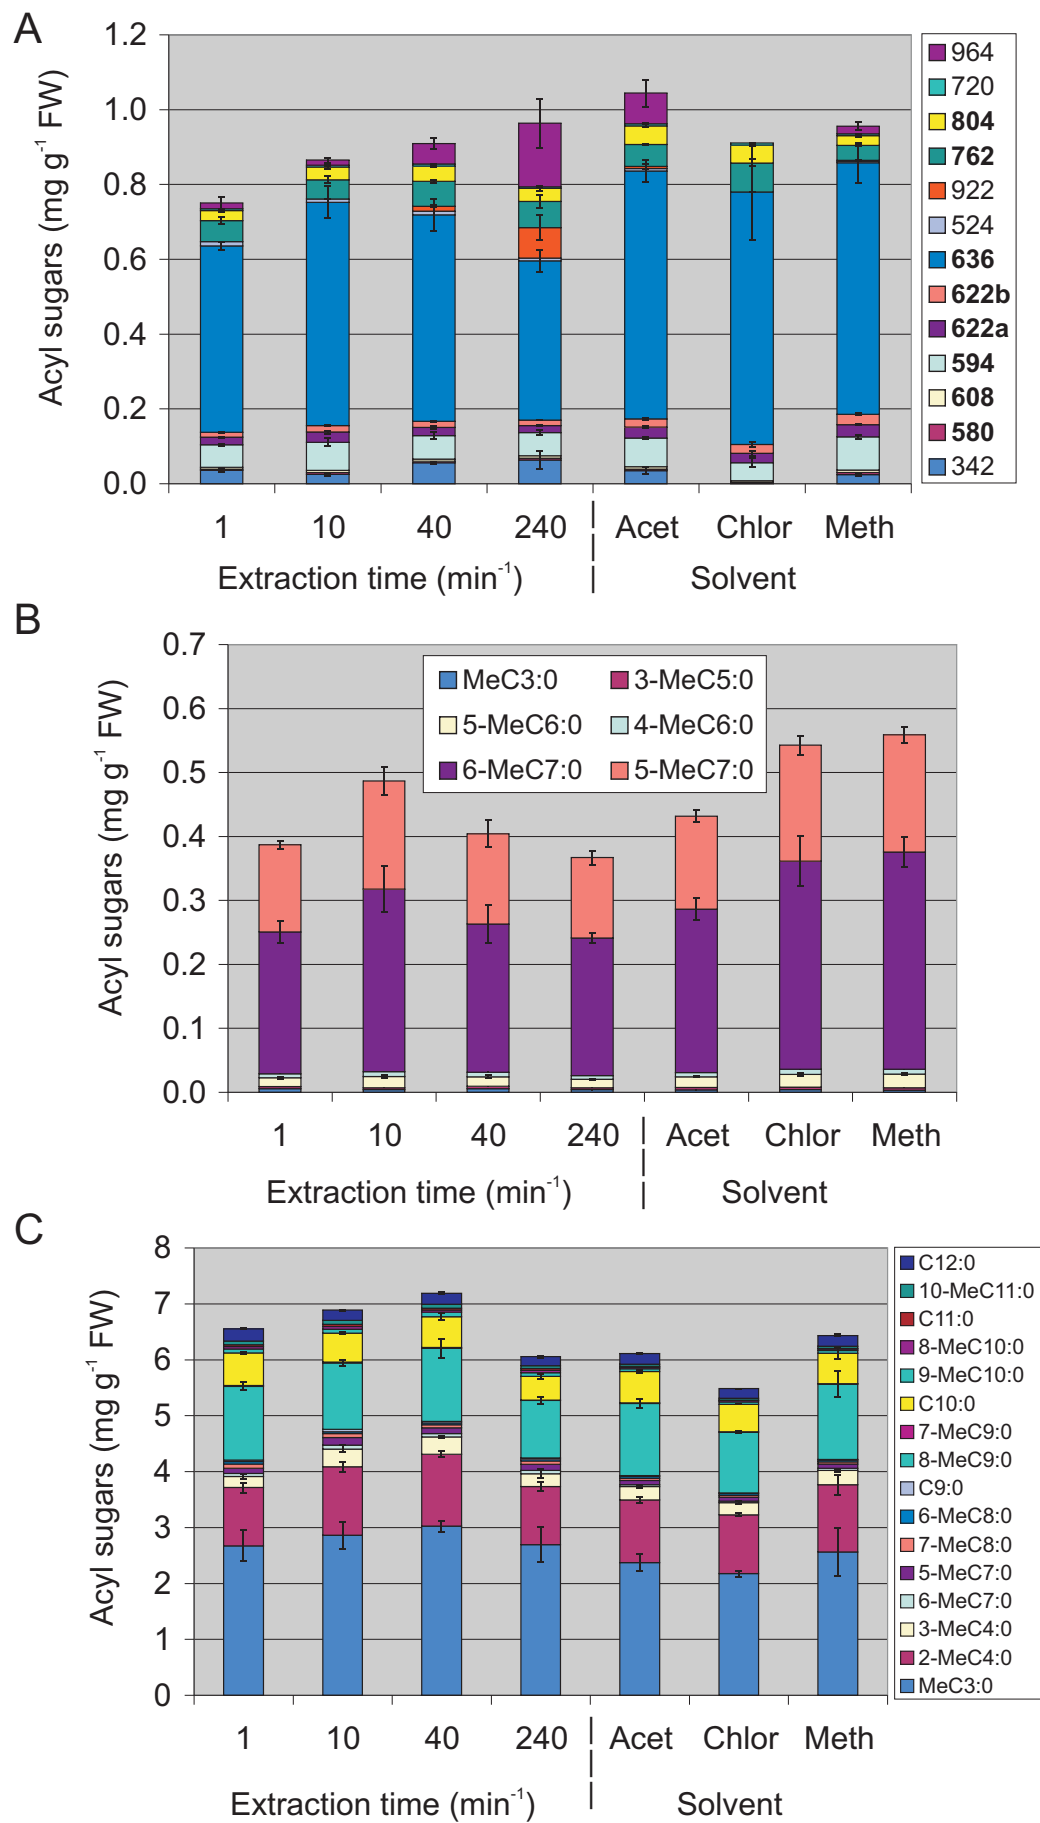

**Figure S2.** Extraction of acyl sugars and BCFA from leaf exudates (refer to next page for full figure legend).

**Figure S2.** Extraction of acyl sugars and BCFA from leaf exudates, with a comparison of different solvents and extraction times. Leaf exudates were extracted using methanol for the indicated extraction periods and with the alternative solvents depicted for 20 min. Acet; acetone; Chlor; chloroform and Meth: methanol. Error bars: standard deviation for 3 replicates. A, Composition and total amount of exudates components extracted from *N. benthamiana* leaf. Major MS spectrum ion MW (-18) values are shown and those corresponding to the acyl sugars (listed in Table S1) are indicated in bold. The contribution of some initially very minor non-acyl sugar constituents increased with longer extraction times, suggesting they were not true exudate components, whereas acyl sugars were fully extracted within 10 min. B, Composition and total amount of BCFA from *N. benthamiana* leaf exudate extracted as above, followed by GC-FID separation of derived FAMES. C, Composition and total amount of acyl sugar fatty acids from *S. pennellii* leaf exudate extracted as above, followed by GC-FID separation of FAMES.
