# Supplementary material
Source: PubMed Central journal article supplement (PMC2593661)
Supplement: pp.108.129510_4.pdf [file pp.108.129510_4.pdf]

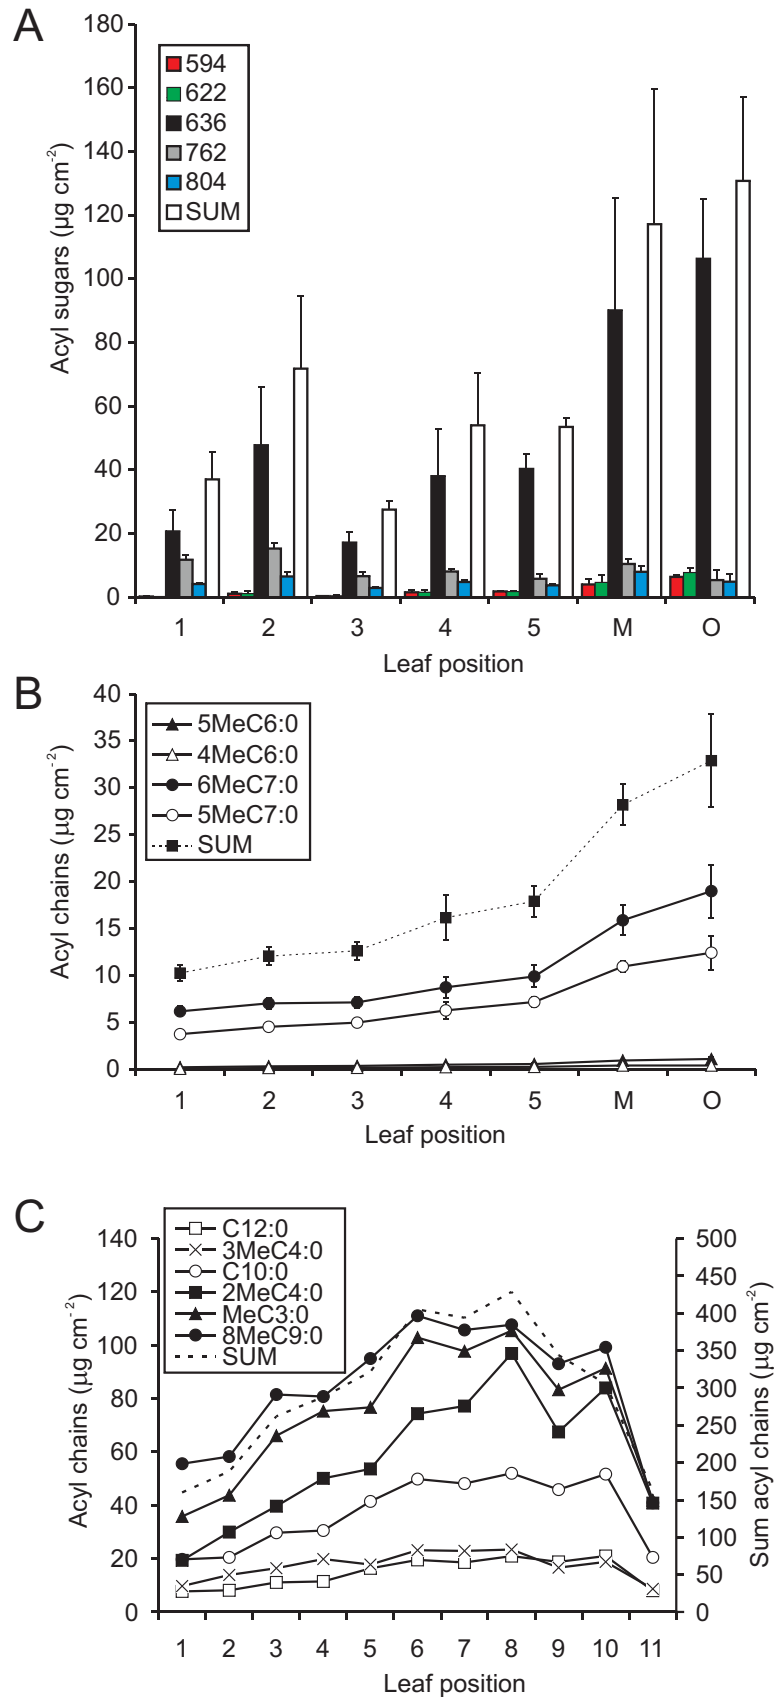

**Figure S4.** Developmental profile of acyl sugars (refer to next page for full figure legend).

**Figure S4.** Developmental profile of acyl sugars and fatty acid components from leaf exudates in *N. benthamiana* (A, B) and *S. pennellii* (C). Data expressed in terms of leaf area for successive leaves counting from the apex (A, B: M: mid-stem leaf, O: old or lower leaf). A, Major acyl sugar species of leaf exudates extracted in methanol identified by LC-MS. Different pattern bars denote acyl sugars labelled according to MW (as defined in Table S1) from successive leaves in 6 week old plants. The approximate abundance of the acyl sugars is measured in comparison to the internal standard sucrose monolaurate. SUM: total of all acyl sugars. Error bars = standard deviation (n=3). B, Major fatty acid species in leaf exudates extracted as in (A). Fatty acid methyl esters (FAMES) were prepared from exudates and analysed by GC-FID. SUM: total of acyl sugar-derived FAMES. Error bars correspond to standard error (n = 4). C, Developmental profile of fatty acid production at the surface of *S. pennellii* leaves. FAMES were derived from the leaf exudates at all leaf positions of 6 week-old *S. pennellii* plants and analysed by GC-FID. SUM: total for all acyl chains (values on right-hand y-axis). Values correspond to the average of 4 duplicated samples.
