# Supplementary material
Source: PubMed Central journal article supplement (PMC2593661)
Supplement: pp.108.129510_5.pdf [file pp.108.129510_5.pdf]

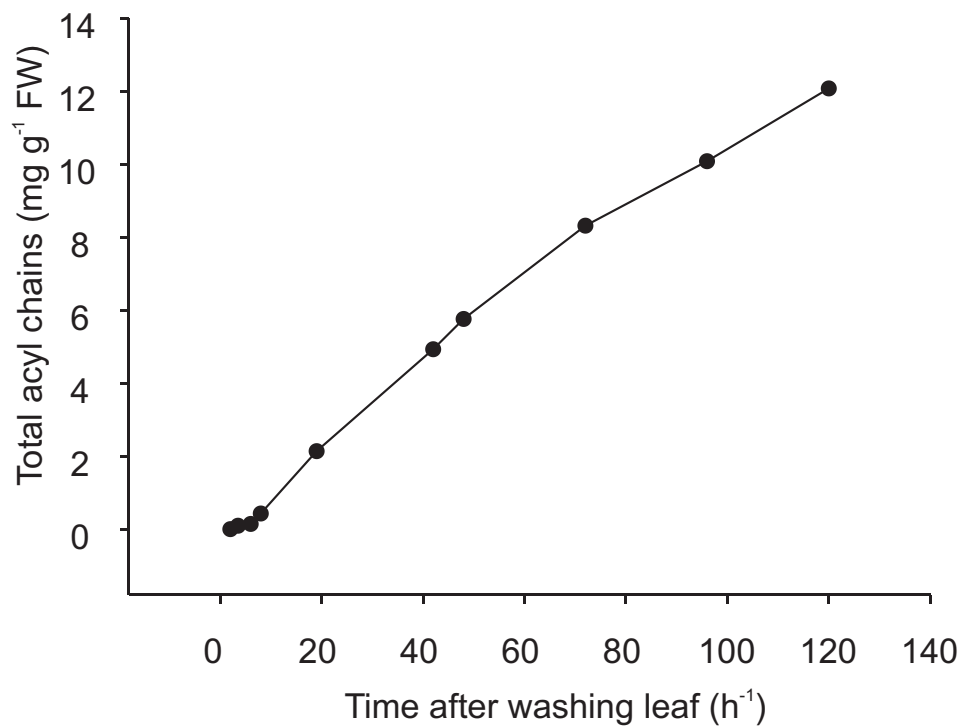

**Figure S5.** *De novo* production of acyl sugars on *S. pennellii* leaves after removal by ethanol. Young expanded leaves were detached from a mature plant, washed in ethanol and placed in water under greenhouse conditions. Leaflets were harvested over time and FAMES derived from acyl sugars were analyzed by GC-FID.
