# Supplementary material
Source: PubMed Central journal article supplement (PMC2593661)
Supplement: pp.108.129510_6.pdf [file pp.108.129510_6.pdf]

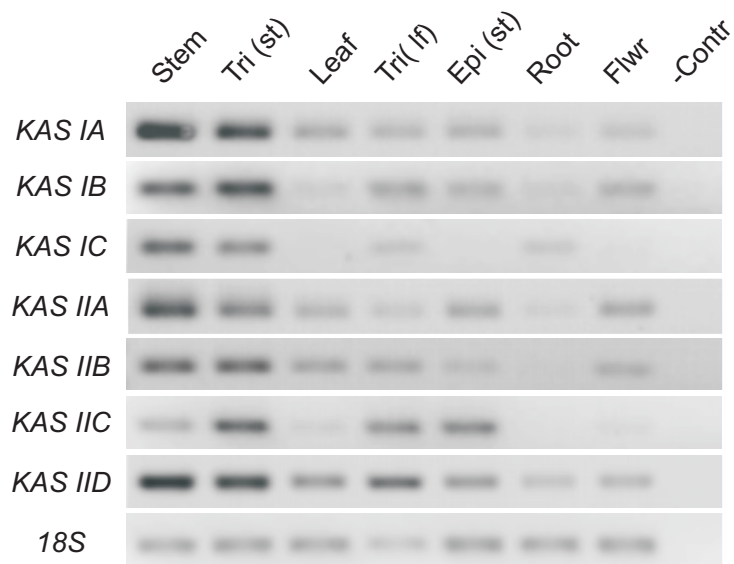

**Figure S6.** Semi-quantitative RT-PCR analysis of the expression of genes encoding KAS I and KAS II homologs in *S. pennellii* tissues. Stem trichomes: Tri (st); Leaf trichomes: Tri (lf); Stem epidermis: Epi (st); Flower: Flwr; -Contr: no cDNA PCR control. cDNA levels were normalized according to 18S RNA levels.
