# Supplementary material
Source: PubMed Central journal article supplement (PMC2593661)
Supplement: pp.108.129510_7.pdf [file pp.108.129510_7.pdf]

**Table S1** Composition of acyl sugars from *N. benthamiana*

| Peak | Major MS spectrum ions (relative intensity value) |          |     |                                                                   | Product ions in MS2 (m/z) for <sup>a</sup>                             | Product ions in MS3 (m/z) for <sup>b</sup> | Predicted subunit substitution |                                 | Major FA observed (FAMES GC-FID) | Putative acyl groups <sup>c</sup> |
|------|---------------------------------------------------|----------|-----|-------------------------------------------------------------------|------------------------------------------------------------------------|--------------------------------------------|--------------------------------|---------------------------------|----------------------------------|-----------------------------------|
|      | Order                                             | Rt (min) | MW  | [M+18] <sup>+</sup> (m/z)                                         |                                                                        |                                            | Glucose                        | Fructose                        |                                  |                                   |
| 1    | 6.66                                              | 580      | 598 | 598(100), 580(1), 563(11), 289(10), 275(84) <sup>a</sup> , 209(5) | 257(12), 239(8), 209(100), 113(18), 95(3)                              | -                                          | C <sub>7</sub>                 | C <sub>8</sub>                  | -                                | [MeC6:0] [MeC7:0]                 |
| 2    | 7.71                                              | 608      | 626 | 626(100), 608(4), 591(17), 289(38) <sup>a</sup> , 223(3), 124(?)  | 271(5), 253(5), 223(100), 162(1), 127(14), 109(5), 97(2)               | -                                          | C <sub>8</sub>                 | C <sub>8</sub> , C <sub>3</sub> | -                                | [MeC7:0][MeC7:0,C3]               |
| 3    | 9.47                                              | 594      | 612 | 612(100), 594(6), 577(10), 289(70) <sup>a</sup> , 223(5)          | 271(5), 253(5), 223(100) <sup>b</sup> , 162(1), 127(14), 109(5), 97(2) | 127                                        | C <sub>8</sub>                 | C <sub>8</sub>                  | 5MeC7:0 > 6MeC7:0                | [MeC7:0] [MeC7:0]                 |
| 4    | 10.76                                             | 622      | 640 | 640(100), 622(4), 605(16), 289(82) <sup>a</sup> , 223(6)          | 271(5), 253(5), 223(100) <sup>b</sup> , 162(1), 127(14), 109(5), 97(2) | 127                                        | C <sub>8</sub>                 | C <sub>7</sub> , C <sub>2</sub> | 5MeC7:0 > 6MeC7:0                | [MeC7:0] [MeC6:0,C2]              |
| 5    | 11.26                                             | 622      | 640 | 640(100), 622(3), 605(15), 275(35) <sup>a</sup> , 209(3)          | 257(12), 239(8), 209(100), 113(18), 95(3)                              | -                                          | C <sub>7</sub>                 | C <sub>8</sub> , C <sub>2</sub> | -                                | [MeC6:0] [MeC7:0,C2]              |
| 6    | 15.76                                             | 636      | 654 | 654(100), 636(3), 619(15), 289(35) <sup>a</sup> , 223(?)          | 271(5), 253(5), 223(100) <sup>b</sup> , 162(1), 127(14), 109(5), 97(2) | 127                                        | C <sub>8</sub>                 | C <sub>8</sub> , C <sub>2</sub> | 6MeC7:0 > 5MeC7:0                | [MeC7:0] [MeC7:0,C2]              |
| 7    | 32.62                                             | 762      | 780 | 780(100), 415(3), 295(2)                                          | 397 <sup>b</sup> , 271, 253, 210, 144, 127                             | 271, 253, 127                              | 2C <sub>8</sub>                | C <sub>8</sub> , C <sub>2</sub> | 6MeC7:0, 5MeC7:0                 | [2xMeC7:0] [MeC7:0,C2]            |
| 8    | 34                                                | 804      | 822 | 822(100), 415(4), 295(2)                                          | -                                                                      | -                                          | 2C <sub>8</sub>                | C <sub>8</sub> , C <sub>3</sub> | -                                | [2xMeC7:0] [MeC8:0,2MeC3:0]       |

Acyl sugars observed in the extracts of *N. benthamiana*, their APCI spectra and the corresponding aliphatic acid groups obtained by LC-MS. Peak and retention times (Rt) refer to major peaks from LC-MS analysis of leaf methanol extracts. Major peaks were collected and FAMES analysed by GC to corroborate model. <sup>c</sup> Putative acyl group composition shown for each monosaccharide subunit.
