# Supplementary material
Source: PubMed Central journal article supplement (PMC2593661)
Supplement: pp.108.129510_9.pdf [file pp.108.129510_9.pdf]

**Table S5** Measurement of chlorophyll (mg/g DW) in leaf trichomes and underlying leaf tissue

Trichomes were harvested from leaves by brushing under liquid nitrogen and remaining leaf used in the comparison. DW, dry weight. Data are the mean of three replicates  $\pm$  SE.

| Plant                | Tissue               |                 |
|----------------------|----------------------|-----------------|
|                      | Leaf minus trichomes | Trichomes       |
| <i>N.benthamiana</i> | 12.00 $\pm$ 0.25     | 1.16 $\pm$ 0.20 |
| <i>S. pennellii</i>  | 14.66 $\pm$ 1.46     | 1.54 $\pm$ 0.88 |
