# Supplementary material
Source: PubMed Central journal article supplement (PMC2593661)
Supplement: pp.108.129510_10.pdf [file pp.108.129510_10.pdf]

**Table S6** List of oligonucleotides

| Gene                                      | Primer                       | Primer pair efficiency |                | Primer sequence                                                               |
|-------------------------------------------|------------------------------|------------------------|----------------|-------------------------------------------------------------------------------|
|                                           |                              | <i>N.benth.</i>        | <i>S.penn.</i> |                                                                               |
| <b>Real-time RT-PCR</b>                   |                              |                        |                |                                                                               |
| SuRA                                      | ALA745_F<br>ALA745_R         | -                      | 100            | 5'-GCCTCACCCCTTCATCTCATC-3'<br>5'-TTCAGGTTCCAGAAACGTCGTTAT-3'                 |
| TD                                        | TD_F<br>TD_R                 | -                      | 100            | 5'-CCGCCGTGAAATCATTGAAT-3'<br>5'-GCTAATAGGAACAATGACGGAAGTC-3'                 |
| <i>IPMS A</i>                             | QIPMSA_for<br>QIPMSA_rev     | 96.1                   | 95.4           | 5'-CAAGTATTAGGTGGCCTCTACACG-3'<br>5'-CATTAGCTCCAACAATGGCCTTA-3'               |
| <i>IPMS B</i>                             | QIPMSB_for<br>QIPMSB_rev     | 100                    | 100            | 5'-CAAGTACTAGGTGGCCTGTATACA-3'<br>5'-CATTAGCTCCAACAATGGCCTTG-3'               |
| <i>IPMS C</i>                             | NbCN199Q_F<br>NbCN199Q_R     | 97.5                   | -              | 5'-CCAAAATACAAGCCGGGAAGA-3'<br>5'-CTTAGCCAGCTGATGTGCAATT-3'                   |
| <i>IPMD</i>                               | QHYD_for<br>QHYD_rev         | 88.4                   | 100            | 5'-TGTCCGATGAAGCATCAATGATTA-3'<br>5'-TTTATCCTGCCAGCAATATCAG-3'                |
| <i>IPDS-L</i>                             | DHT_for<br>DHT_rev           | 100                    | 100            | 5'-AAGGTATGGATGGATGTATATAGCCTC-3'<br>5'-GTGTCTTTAGGGCCACCCAAAAC-3'            |
| <i>BCKD E1-β</i>                          | BOX_F<br>BOX_R               | 100                    | -              | 5'-TCAAGCATACTGACCCAAA-3'<br>5'-TGAGGACCTCTGCCTCAGAT-3'                       |
| <i>BCKD E1-β</i>                          | BOX_F1<br>BOX_R1             | -                      | 100            | 5'-TCAAGCATACTGACCCAAA-3'<br>5'-TGAGGACCTCTGCCTCAGAT-3'                       |
| <i>BCKD E2</i>                            | DHLAT_for<br>DHLAT_rev       | 100                    | -              | 5'-GTGAAGTTCAGAGTGACAAAGCAA-3'<br>5'-CGATCTTCAAAGTGTCTTCCAA-3'                |
| <i>BCKD E2</i>                            | DHLAT2_F<br>DHLAT2_R         | -                      | 100            | 5'-TGTCGAAGAGATAAATTGTGATGC-3'<br>5'-TGAGGACGGGAAGGAAAGTG-3'                  |
| <i>KAS III A</i>                          | K1Q_FOR<br>K1Q_REV           | -                      | 95.3           | 5'-ATTCGGTGGACAAATTAGAGGAT-3'<br>5'-TCAAGCCTTCTATCATTCTTACCA-3'               |
| <i>KAS I A</i>                            | K3Q_FOR<br>K3Q_REV           | -                      | 100            | 5'-ATTCGGTGGACAAATTAGAGGAT-3'<br>5'-TCAAGCCTTCTATCATTCTTACCA-3'               |
| <i>KAS I B</i>                            | K4QA_FOR<br>K4Q_REV          | -                      | 91.8           | 5'-TCGCATCGTTAACATCGAAAAG-3'<br>5'-AGTGGAGACGGACGAAATGATA-3'                  |
| <i>KAS I C</i>                            | K5Q_FOR<br>K5Q_REV           | -                      | 90.1           | 5'-GTGTGTTTGGAGAAAATGAGTAGTATTACTT-3'<br>5'-GCAGAGTTTGCTGTCAATTTCA-3'         |
| <i>ACTIN</i>                              | Le-Actin-5'Q<br>Le-Actin-3'Q | 97.9                   | 100            | 5'-AAATTGTCAGGGACGTGAAAGAA-3'<br>5'-TCTCAACAGAAGAGCTGGTCTTTG-3'               |
| <i>GAPDH</i>                              | Le-GAPDH-5'<br>Le-GAPDH-3'   | 100                    | 97.2           | 5'-GGCATTGTTGAGGGTCTCATG-3'<br>5'-ATGGATGGACCATCAACAGTTTTC-3'                 |
| <b>Semi-quantitative PCR/VIGS cloning</b> |                              |                        |                |                                                                               |
| <i>IPMS A and B</i>                       | IPMS2X_FOR<br>IPMS2X_REV     | +                      | +              | 5'-GGGGCTCGAGCCTGATACTGTTGGATACAC-3'<br>5'-GGTTGGATCCGTGTTTTAACATTCCATCC-3'   |
| <i>BCKD E1-β</i>                          | BOXD1_FOR<br>BOXD1_REV       | +                      | +              | 5'-GGCGCTCGAGTCGTTCTTATGTATTGGAGAAG-3'<br>5'-GCCCGGATCCTCCAACAGCTCCATAAGGT-3' |
| <i>BCKD E1-α I</i>                        | AOXDN2_FOR<br>AOXDN2_REV     | +                      | -              | 5'-GGGCTCGAGCATTTTCCGGTAAGTCTG-3'<br>5'-GCCTGGATCCCTTCTCTCCAGCAGTT-3'         |
| <i>BCKD E1-α I</i>                        | AOXDC1_FOR<br>AOXDC1_REV     | -                      | +              | 5'-GCCCTCGAGTAGCCACCATTAACA-3'<br>5'-GGTTGGATCCTTTAATGGCACTTTGTCTATAA-3'      |
| <i>BCKD E1-α II</i>                       | AOXDN1_for<br>AOXDN1_rev     | -                      | +              | 5'-GGGGCTCGAGATTTTCAATCTTTGGTTT-3'<br>5'-GCCTGGATCCGATAGCTTCTTCCAACT-3'       |
| <i>BCKD E1-α III</i>                      | AOXDN3_FOR<br>AOXDN3_REV     | -                      | +              | 5'-GGGCTCGAGCTTTTCCGGCAAGTCTA-3'<br>5'-GGTTGGATCCCTTCCAAAAGTGGTCA-3'          |
| <i>KAS I A</i>                            | 5KASI946for<br>6KASI946rev   | -                      | +              | 5'-CGGGCTCGAGATGCAAGCTATCCAATCTT-3'<br>5'-CCCTGGATCCCCCACTTTACCAGCT-3'        |
| <i>KAS I B</i>                            | 7KASI966for<br>8KASI966rev   | -                      | +              | 5'-GCGCCTCGAGTTGGAAGCAATCCAATCTC-3'<br>5'-TGCCGGATCCTCCCACTTTACCAGCC-3'       |
| <i>KAS I C</i>                            | 9KASI565for<br>10KASI565rev  | -                      | +              | 5'-CGGGCTCGAGTCAATGGTGGATCTCATTTA-3'<br>5'-GCCTGGATCCTAAACTGATTCCACTCTGC-3'   |
| <i>KAS II A</i>                           | 21KASII174f<br>22KASII174r   | -                      | +              | 5'-GGGGCTCGAGTGCTCATCCTGGCAAAC-3'<br>5'-CCCTGGATCCCATGAATTTATCTGCTCTTTTC-3'   |
| <i>KAS II B</i>                           | 17KASII868f<br>18KASII868r   | -                      | +              | 5'-GGGGCTCGAGTCTTATGCTCAAACAGGG-3'<br>5'-TCCGGGATCCATTCTTTTAGAAAAGTTGGGTA-3'  |
| <i>KAS II C</i>                           | 11KASI820for<br>12KASI820rev | -                      | +              | 5'-GGCCCTCGAGTTGAATCAGATATCGGATCA-3'<br>5'-GCGGGGATCCGGCCATAATTCATCGATAT-3'   |
| <i>KAS II D</i>                           | 19KASII241f<br>20KASII241r   | -                      | +              | 5'-GGGGCTCGAGGGCAGTGCAAGACAAGGT-3'<br>5'-GCCTGGATCCGATGAATGTCCATTCCG-3'       |
| <i>KAS II E</i>                           | 13KASX458for<br>14KASX458rev | -                      | +              | 5'-GGCCCTCGAGTCAATTTCCAAGCAGTTGTG-3'<br>5'-GCGGGGATCCGCTCTAAGAAGGAGCGCTT-3'   |
| <i>HR7</i>                                | HR7_for<br>HR7_rev           | -                      | +              | 5'-GATAAATACATCAAGTGAAGTCA-3'<br>5'-CATTTTCCAATCAAAGTAGCATCA-3'               |
| <i>ACTIN</i>                              | Le-Actin-5'<br>Le-Actin-3'   | +                      | +              | 5'-TGTGCTGGACTCTGGAGATG-3'<br>5'-CAGCTTCCATTCCGATCATT-3'                      |
| <i>18S</i>                                | 18SrRNA-5'<br>18SrRNA-3'     | +                      | +              | 5'-AAACGGCTACCACATCCAAG-3'<br>5'-TCATTACTCCGATCCCGAAG-3'                      |

List of primers used for RT-PCR analyses and gene cloning. Gene accessions used for primer design are listed in Table S7. Primer pair efficiencies are indicated for real-time RT-PCR primers with cDNA from both species and effectiveness is indicated (+) for other primers.
