# Supplementary material
Source: PubMed Central journal article supplement (PMC2593661)
Supplement: pp.108.129510_11.pdf [file pp.108.129510_11.pdf]

**Table S7. List of gene accessions**

List of genes potentially relevant to acyl sugar chain synthesis for which gene knockdown or real-time/semi-quantitative RT-PCR analyses were performed.

| Gene product                                     | EC No.   | Alias                                | Accession <sup>a</sup> |                                                    | Arabidopsis comparison <sup>b</sup> |          |
|--------------------------------------------------|----------|--------------------------------------|------------------------|----------------------------------------------------|-------------------------------------|----------|
|                                                  |          |                                      | SGN-Unigene            | TIGR TC/GenBank                                    | Top hit                             | Gene No. |
| <i>Branched-chain amino acid synthesis</i>       |          |                                      |                        |                                                    |                                     |          |
| Acetolactate synthase                            | 2.2.1.6  | <i>SuRA</i> <sup>c</sup>             | SGN-U213768            | TC116383, TC116384                                 | At3g48560                           | 1        |
| Threonine dehydratase/deaminase                  | 4.2.1.16 | <i>TD</i>                            | SGN-U215900            | TC125347, TC130656                                 | At3g10050                           | 1        |
| 2-isopropylmalate synthase                       | 2.3.3.13 | <i>IPMSA</i>                         | SGN-U213969            | AF004165 ( <i>S.p.</i> ), TC116845                 | At1g74040                           | 4        |
|                                                  |          | <i>IPMSB</i>                         | SGN-U232722            | AF004166 ( <i>S.p.</i> ), TC121075                 | "                                   | 4        |
|                                                  |          | <i>IPMSC</i>                         | -                      | CN747199 ( <i>N.b.</i> ), CN747285 ( <i>N.b.</i> ) | "                                   | 4        |
| 3-isopropylmalate dehydrogenase                  | 1.1.1.85 | <i>IPMD</i>                          | SGN-U216021            | TC172598, TC9040 ( <i>N.b.</i> )                   | At1g80560                           | 5        |
| 3-isopropylmalate dehydratase (large subunit)    | 4.2.1.33 | <i>IPDS L</i>                        | SGN-U217800            | TC171246, EB450252 ( <i>N.b.</i> )                 | At4g13430                           | 4        |
| <i>Branched-chain amino acid degradation</i>     |          |                                      |                        |                                                    |                                     |          |
| Branched-chain $\alpha$ -keto-acid dehydrogenase | 2.7.11.4 |                                      |                        |                                                    |                                     |          |
| E1 alpha subunit                                 |          | <i>BCKD E1-<math>\alpha</math>I</i>  | -                      | TC164675, TC166453                                 | At1g21400                           | 4        |
|                                                  |          | <i>BCKD E1-<math>\alpha</math>II</i> | -                      | BF097511, BE462642                                 | At5g09300                           | 4        |
|                                                  |          | <i>BCKD E1-<math>\alpha</math>II</i> | -                      | TC163728                                           | At1g21400                           | 4        |
| E1 beta subunit                                  |          | <i>BCKD E1-<math>\beta</math></i>    | SGN-U214608            | TC154476                                           | At3g13450                           | 2        |
| E2 subunit                                       |          | <i>BCKD E2</i>                       | SGN-U221864            | TC166484, DV161610 ( <i>N.t.</i> )                 | At3g06850                           | 1        |
| <i>Fatty acid elongation</i>                     |          |                                      |                        |                                                    |                                     |          |
| Beta-ketoacyl-ACP synthase III                   | 2.3.1.41 | <i>KAS III A</i>                     | SGN-U218414            | TC155699                                           | At1g62640                           | 1        |
|                                                  |          | <i>KAS III B</i>                     | -                      | AW624974                                           | "                                   | 1        |
| Beta-ketoacyl-ACP synthase (mitochondrial)       |          | <i>mt KAS</i>                        | -                      | TC159806                                           | At2g04540                           | 1        |
| Beta-ketoacyl-ACP synthase I                     |          | <i>KAS I A</i>                       | -                      | TC163946, AI490848                                 | At5g46290                           | 1        |
|                                                  |          | <i>KAS I B</i>                       | -                      | TC165966, TC163947, AW036186                       | "                                   | 1        |
|                                                  |          | <i>KAS I C</i>                       | -                      | TC168565, AW033405                                 | "                                   | 1        |
|                                                  |          | <i>KAS II A</i>                      | -                      | TC155174                                           | At1g74960                           | 1        |
| Beta-ketoacyl-ACP synthase II                    |          | <i>KAS II B</i>                      | -                      | TC165868, TC158629                                 | "                                   | 1        |
|                                                  |          | <i>KAS II C</i>                      | -                      | TC167820                                           | "                                   | 1        |
|                                                  |          | <i>KAS II D</i>                      | -                      | TC168241                                           | "                                   | 1        |

<sup>a</sup>SGN-Unigene numbers correspond to those listed in the TOM2 microarray expression data (Tables S2 and S3). TIGR TC/GenBank gene accessions are from *S. lycopersicum* unless denoted otherwise: *S.p.*, *S. pennellii*; *N.b.*, *N. benthamiana* or *N.t.*, *N. tabacum*. <sup>b</sup>Arabidopsis top hit refers to highest scoring Arabidopsis gene in a WuBLAST search using the tomato accession. Gene number refers to the number of genes in Arabidopsis sharing highest homology to a given enzyme primary sequence that was used in the blast search. <sup>c</sup>TOM2 probe is annotated as SuRB (Table I) but corresponds in sequence to the most up to date entry SGN-U313745, annotated as SuRA (Table II).
